1 **Expanding the Phenotypic spectrum of *NAA10*-related neurodevelopmental syndrome**  
2 **and *NAA15*-related neurodevelopmental syndrome**

3  
4 Gholson J. Lyon<sup>1,2,3\*</sup>, Marall Vedaie<sup>1,#</sup>, Travis Besheim<sup>1,#</sup>, Agnes Park<sup>1,#</sup>, Elaine Marchi<sup>1</sup>, Leah  
5 Gottlieb<sup>4,5</sup>, Tzung-Chien Hsieh<sup>6</sup>, Hannah Klinkhammer<sup>6,7</sup>, Katherine Sandomirsky<sup>1</sup>, Hanyin  
6 Cheng<sup>8</sup>, Lois J. Starr<sup>9</sup>, Isabelle Preddy<sup>1</sup>, Marcellus Tseng<sup>1</sup>, Quan Li<sup>10</sup>, Yu Hu<sup>11</sup>, Kai Wang<sup>11</sup>, Ana  
7 Carvalho<sup>12</sup>, Francisco Martinez<sup>13</sup>, Alfonso Caro-Llopis<sup>14</sup>, Maureen Gavin<sup>2</sup>, Karen Amble<sup>2</sup>, Peter  
8 Krawitz<sup>6</sup>, Ronen Marmorstein<sup>4,5,15</sup>, Ellen Herr-Israel<sup>2</sup>

9  
10 <sup>1</sup>Department of Human Genetics, New York State Institute for Basic Research in Developmental  
11 Disabilities, Staten Island, New York, United States of America

12 <sup>2</sup>George A. Jarvis Clinic, New York State Institute for Basic Research in Developmental  
13 Disabilities, Staten Island, New York, United States of America

14 <sup>3</sup>Biology PhD Program, The Graduate Center, The City University of New York, New York,  
15 United States of America

16 <sup>4</sup>Department of Chemistry, University of Pennsylvania, Philadelphia, United States of America

17 <sup>5</sup>Abramson Family Cancer Research Institute, Perelman School of Medicine, University of  
18 Pennsylvania, Philadelphia, United States of America

19 <sup>6</sup>Institute for Genomic Statistics and Bioinformatics, University Hospital Bonn, Rheinische  
20 Friedrich-Wilhelms-Universität Bonn, Bonn, Germany

21 <sup>7</sup>Institute for Medical Biometry, Informatics and Epidemiology,  
22 University Hospital Bonn, Rheinische Friedrich-Wilhelms-Universität  
23 Bonn, Bonn, Germany

24 <sup>8</sup>HematoLogics Inc. Seattle, Washington, United States of America

25 <sup>9</sup>Department of Pediatrics, University of Nebraska Medical Center; Omaha, Nebraska

26 <sup>10</sup>Princess Margaret Cancer Centre, University Health Network, University of Toronto, Toronto,  
27 Ontario, M5G2C1, Canada

28 <sup>11</sup>Raymond G. Perelman Center for Cellular and Molecular Therapeutics, Children's Hospital of  
29 Philadelphia, Philadelphia, PA 19104, United States of America

30 <sup>12</sup> Department of Medical Genetics, Pediatric Hospital, Coimbra Hospital and University Centre,  
31 Coimbra, Portugal

32 <sup>13</sup> Unidad de Genetica, Hospital Universitario y Politecnico La Fe, Valencia 46026, Spain

33 <sup>14</sup> Grupo de Investigacion Traslacional en Genetica, Instituto de Investigacion Sanitaria La Fe,  
34 Valencia 46026, Spain

35 <sup>15</sup>Department of Biochemistry and Biophysics, Perelman School of Medicine, University of  
36 Pennsylvania, Philadelphia, United States of America

37

38 #co-equal second authors

39 \* Corresponding author

40 E-mail: [gholsonjlyon@gmail.com](mailto:gholsonjlyon@gmail.com) / [gholson.j.lyon@opwdd.ny.gov](mailto:gholson.j.lyon@opwdd.ny.gov) (GJL)

41

## 42 **Abstract**

43 Amino-terminal (Nt-) acetylation (NTA) is a common protein modification, affecting 80%  
44 of cytosolic proteins in humans. The human essential gene, *NAA10*, encodes for the enzyme  
45 *NAA10*, which is the catalytic subunit in the N-terminal acetyltransferase A (NatA) complex, also  
46 including the accessory protein, *NAA15*. The full spectrum of human genetic variation in this  
47 pathway is currently unknown. Here we reveal the genetic landscape of variation in *NAA10* and  
48 *NAA15* in humans. Through a genotype-first approach, one clinician interviewed the parents of  
49 56 individuals with *NAA10* variants and 19 individuals with *NAA15* variants, which were added  
50 to all known cases (N=106 for *NAA10* and N=66 for *NAA15*). Although there is clinical overlap  
51 between the two syndromes, functional assessment demonstrates that the overall level of  
52 functioning for the probands with *NAA10* variants is significantly lower than the probands with  
53 *NAA15* variants. The phenotypic spectrum includes variable levels of intellectual disability,  
54 delayed milestones, autism spectrum disorder, craniofacial dysmorphism, cardiac anomalies,

55 seizures, and visual abnormalities (including cortical visual impairment and microphthalmia).  
56 One female with the p.Arg83Cys variant and one female with an *NAA15* frameshift variant both  
57 have microphthalmia. The frameshift variants located toward the C-terminal end of *NAA10* have  
58 much less impact on overall functioning, whereas the females with the p.Arg83Cys missense in  
59 *NAA10* have substantial impairment. The overall data are consistent with a phenotypic spectrum  
60 for these alleles, involving multiple organ systems, thus revealing the widespread effect of  
61 alterations of the NTA pathway in humans.

62

### 63 **Introduction**

64 Targeting 40% of the human proteome, NatA, the major N-terminal acetyltransferase  
65 (NAT) complex, acetylates Ser-, Ala-, Gly-, Thr-, Val-, and Cys- N-termini following cleavage of  
66 the initiator methionine<sup>1,2</sup>. The canonical human NatA consists of two main subunits, the  
67 catalytic subunit N- $\alpha$ -acetyltransferase 10 (*NAA10*) (*Ard1*) and the auxiliary subunit *NAA15*  
68 (*Nat1*) and engages with a regulatory subunit, *HYPK*<sup>3-5</sup>. *NAA15* function has been linked to cell  
69 survival, tumor progression, and retinal development<sup>6,7</sup>. N-terminal (Nt-) acetylation (NTA) is  
70 one of the most common protein modifications, occurring co- and post-translationally<sup>8</sup>.  
71 Approximately 80% of cytosolic proteins are N-terminally acetylated in humans and ~50% in  
72 yeast<sup>1</sup>, while NTA is less common in prokaryotes and archaea<sup>8</sup>.

73 NTA is catalyzed by a set of enzymes, the NATs, which transfer an acetyl group from  
74 acetyl coenzyme A (Ac-CoA) to the free  $\alpha$ -amino group of a protein's N-terminus. To date, eight  
75 distinct NATs (*NatA* – *NatH*) have been identified in metazoan (*NatA-F* and *NatH*) and plant  
76 (*NatG*) species that are classified based on different conserved subunit compositions and  
77 substrate specificities. NTA has been implicated in steering protein folding, stability or  
78 degradation, subcellular targeting, and complex formation<sup>9</sup>. Particularly, *Naa10*-catalyzed N-  
79 terminal acetylation has been reported to be essential for development in many species and  
80 although *NatA* is not essential in *S. cerevisiae*, depletion of *Naa10* or *Naa15* has strong effects,

81 including slow growth and decreased survival when exposed to various stresses. In addition, it  
82 has been recently shown that mice have a compensating enzyme *Naa12*, which prevents  
83 embryonic lethality in the *Naa10* knockouts<sup>10</sup>, but a similar gene has not been found in humans.  
84 Furthermore, *NAA10* was also identified in screens for essential genes in human cell lines<sup>11,12</sup>.

85 Ogden syndrome (OS) was first reported in 2011, and it was given this name due to the  
86 location of the first affected family residing in Ogden, Utah, USA<sup>13,14</sup>. In that first family, five  
87 males were born to four different mothers and all the males died in early infancy, with a range of  
88 cardiac and other defects, including lethal cardiac arrhythmias. The underlying genetic defect  
89 was characterized: this variant involved a single missense change coding for Ser37Pro in the X-  
90 linked gene, *NAA10*, which was found in a second independent family in California, USA with  
91 three males that had also died during infancy. The identical variant was recently reported in a  
92 third family<sup>15</sup>. There is a *S. cerevisiae* model for the *Naa10* Ser37Pro mutant, in which that  
93 variant impairs NatA complex formation and leads to a reduction in both NatA catalytic activity  
94 and functionality<sup>16,17</sup>. Furthermore, OS patient-derived cells have impaired *in vivo* NTA of a few  
95 NatA substrates<sup>18</sup>.

96 Since the initial discovery of OS in 2011, multiple groups have reported additional  
97 variants either in *NAA10* in both males and females<sup>19–27</sup> or in the heterodimeric protein partner  
98 encoded by *NAA15*<sup>20,28,29</sup> (although reference limitations at the journal do not allow us to cite all  
99 relevant papers, so we are only citing a few here, but see **Supplementary Discussion**). Given  
100 that *NAA10* and *NAA15* are part of the NatA complex, it is very likely that there might be shared  
101 phenotypes in individuals with pathogenic variants in either of them. As such, the goal of the  
102 present study was for one clinician-scientist (G.J.L.) to meet many families with *NAA10* and  
103 *NAA15* variants directly and prospectively to uncover patterns that might have been missed by  
104 the prior retrospective reviews of medical records and/or summaries provided by the referring  
105 clinicians. The prospective collection of phenotyping information presented here, through a set  
106 of direct interviews with the families, has produced a better overall understanding of the range of

107 organ systems affected and the overall natural history of these conditions. In addition, a subset  
108 of these families underwent functional assessment of the probands, with one psychologist (E.I.)  
109 administering the Vineland-3 to all patients coming to the Jervis clinic for developmental  
110 assessments.

111

## 112 **Materials and Methods**

### 113 **Clinical features methodology**

114 New families were either self-referred, referred by their clinicians, or referred by social  
115 media Facebook group parent managers to the corresponding author (GJL). Consent forms were  
116 provided to the families for a research study collecting medical information and, for those families  
117 who provided written consent, an in-person assessment or videoconference assessment was  
118 performed with each family by G.J.L. The in-person assessments included nine visits by *NAA10*  
119 families from September 2019 to March 2020, but these visits stopped with the onset of the  
120 COVID19 pandemic in March 2020. During these nine visits, the research participants were  
121 examined by a medical geneticist, a neurologist, a psychiatrist, and an optometrist. Phenotypic  
122 information was also obtained from clinical records with varying data available, ranging from a list  
123 of the key clinical features to detailed history and examination findings. A separate written  
124 informed consent was obtained for publication of photographs.

125 A summary template was formulated and filled in for each research participant, where  
126 this template was first completed by a research coordinator (E.M.) and then reviewed by a  
127 second person for accuracy. These summaries are available from the corresponding author, as  
128 MedRxiv does allow posting of such information, and these summaries will be submitted as  
129 Supplementary Information for eventual publication in a peer-reviewed journal. The phenotype  
130 information from all published and unpublished cases was uploaded to the Human Disease  
131 Gene website series <sup>30</sup> with secondary data quality control completed by a second person as  
132 well, to ensure accuracy and completeness. Human Phenotype Ontology (HPO) terms were

133 selected in the Human Disease Gene website and the percentages represent the collation of  
134 groups of multiple terms falling under one feature archetype. For example, “Motor delay”  
135 included all probands listed as having “Gait disturbance”, “Fine Motor Delay”, “Gross Motor  
136 Delay”, “Difficulty Standing” or “Inability to stand” entered into their summary. While the intent of  
137 this method was to create a more simplified and comprehensive gestalt of the OS patient, the  
138 natural limitation to this method is the lack of nuance in distinguishing minute differences in  
139 presentation from one patient to another. Another limitation may be the overlap of symptoms  
140 falling between different feature archetypes, such as “Poor eye contact” being heavily  
141 associated with (but not exclusive to) “autistic behavior”, the latter intended to reflect more  
142 stereotyped and repetitive behavior. Future research may wish to parse out the fine distinctions  
143 between these behaviors for greater clarity. Both pertinent positive and negative features were  
144 noted, with phenotypes classified as “pertinent negatives” only if the provided clinical  
145 information explicitly stated that a phenotype was denied by the parents, was noted to be  
146 absent during physical examinations, or not reported during diagnostic procedures. Clinical  
147 features were only reported as pertinent negatives if this was explicitly mentioned in the records,  
148 otherwise, these were classified as “unknown” or “not available”. The relative prevalence of  
149 each phenotype was calculated by dividing the number of individuals positive for the phenotype  
150 by the sample size. Percentiles for head circumference, weight and height were calculated  
151 using CDC growth charts. On the website, for *NAA10*, the protein variants were numbered with  
152 three significant digits, thus allowing sorting in order from 1 to 235 amino acids; for example,  
153 p.Arg83Cys. For *NAA15*, the cDNA and protein variants were numbered with four digits, also to  
154 allow sorting.

155

#### 156 **Variant identification and Bioinformatics Methodology:**

157 Variants were identified primarily using exome sequencing through clinical diagnostic  
158 testing. The sequencing kits and technology varied based on the different companies involved,

159 and the variants of interest were highlighted and verified in the collected clinical diagnostic test  
160 reports.

161 For the annotation of ClinVar variants, the combined annotation dependent depletion  
162 (CADD) scores, MPC scores, Polyphen-2, SIFT scores, M-CAP\_score and GERP++\_RS were  
163 retrieved from the dbNSFP4.3a database. Consensus scoring for “pathogenic” was assigned  
164 when CADD-scores were above 23, MPC scores were  $\geq 2$ , GERP++\_RS score were  $\geq 2$ , and  
165 SIFT, Polyphen and M-CAP all provided supportive evidence for pathogenicity for these  
166 variants. The variant was assigned by consensus as benign when more than 3 above  
167 approaches provided evidence of benign or tolerance. We also classified variants according to  
168 the ACMG Guidelines and the Association for Molecular Pathology (ACMG/AMP) framework <sup>31</sup>.  
169 For gnomAD frequency, the population maximum frequency is set at 4.066e-06 in Annovar, so a  
170 period in that column (**Supplementary Table 4**) indicates that the allele is less frequent than  
171 this.

172

### 173 **Molecular Analysis of NAA10 and NAA15 Mutations**

174 Molecular effects of the mutations in NAA10 and NAA15 subunits were discussed based  
175 upon the human NatA crystal structure (PDB: 6C9M) and the human NatA/HYPK crystal  
176 structure (PDB: 6C95), with the heterodimeric NatA crystal structure being used as a  
177 representative model for the prepared figures. The structures were visually inspected using  
178 PyMol, which was also used in conjunction with Adobe Illustrator CC to prepare **Figure 4** and  
179 **Figure 5**. The discussion was also informed by numerous biochemical and biophysical studies  
180 of NAA10 and NAA15 mutant proteins <sup>13,16,18–21,23,32,33</sup>.

### 181 **Patient clustering analysis description**

182 Phenotypes (manually curated HPO terms and identifiers) of patients were extracted using Perl  
183 and taken as input of clustering analysis. Resnik similarity score<sup>34</sup> was calculated between any  
184 two HPO terms using the Python module `ssmpy`<sup>35</sup>. Given each pair of patients, the similarity  
185 score is formalized as:

$$186 \quad Sim(P_1, P_2) = avg \left( \sum_{t \in P_1} \left( \max_{t' \in P_2} Sim(t, t') \right) \right)$$

187 where  $P_1$  and  $P_2$  represent patient 1 and 2, and  $t$  and  $t'$  represent HPO terms in patient 1 and 2.  
188 Similarity score matrix between patients were taken as input of software R. Patient-patient  
189 difference were calculated based on 1/Resnik similarity score. Hierarchical clustering analysis  
190 was performed using `hclust` function in R based on patient-patient difference. Hierarchical  
191 clustering results was visualized as dendrogram in R. Patients from NAA10 and NAA15 were  
192 highlighted using different colors. In addition to tree structure, we visualized the clustering results  
193 using multidimensional scaling (MDS) based on patient-patient difference matrix. Specifically, we  
194 assume  $x_i = (x_{i1}, \dots, x_{in})$  in n-dimensional space for each patient  $i$  and estimate coordinate matrix  
195  $X = (x_1, \dots, x_N)$  for all patients by minimizing strain function:

$$196 \quad Strain(x_1, \dots, x_N) = \left( \frac{\sum_{i,j} (b_{ij} - x_i^T x_j)^2}{\sum_{i,j} b_{ij}^2} \right)^{1/2}$$

197 where  $b_{ij}$  are element of the double centralized patient-patient difference matrix  $B =$   
198  $-\frac{1}{2}(I - J_n)D_n(I - J_n)$ , where  $I$  is identity matrix,  $J_n$  is all-one matrix and  $D_n$  is patient-patient  
199 distance square matrix. Then, to minimize the strain function above, singular value  
200 decomposition is applied to matrix  $B$ . Patient-coordinate matrix  $X = E_m \Lambda_m^{1/2}$  where  $E_m$  is the  
201 matrix of  $m$  eigenvectors of  $B$  and  $\Lambda_m$  is the diagonal of  $m$  eigenvalue of  $B$ . To visualize the  
202 patient clustering results, we reduce dimension of  $X$  to two by selecting top two largest  
203 eigenvalue of  $E_m$ . All process is implemented in R.

204



## 205 **Facial Gestalt Methodology**

206 To validate whether two cohorts share a similar facial phenotype, we conducted a statistical  
207 analysis in the clinical face phenotype space of GestaltMatcher<sup>36,37</sup>. In this analysis, we analyze  
208 78 NAA10 patients and 33 NAA15 patients, including the patients reported in this work and the  
209 previously published patients in the GestaltMatcher Database (GMDB;  
210 <https://db.gestaltmatcher.org>). The information on all patients performed in this analysis is shown  
211 in **Supplementary Table 6**. The mean pairwise cosine distance between patients from the two  
212 cohorts is examined to measure the similarity. We sampled control distributions of mean pairwise  
213 distances between two cohorts stemming a) from the same syndrome and b) from two different  
214 syndromes (shown in blue (a) and red (b) in **Supplementary Figure 8**). Cohorts were sampled  
215 from patients in the GMDB that were not included in the training of GestaltMatcher. Then, a ROC  
216 analysis was conducted to derive a threshold to decide whether two cohorts stem from the same  
217 or different syndromes. The control distributions and resulting threshold were tuned via a five-fold  
218 cross-validation resulting in a final threshold of  $c = 0.9176$ . To test the similarity of the two cohorts  
219  $C_1$  and  $C_2$ , their mean pairwise cosine distance  $d(C_1, C_2)$  is calculated and compared to  $c$ .  
220 Additionally, we sample two subcohorts from  $C_1$  and  $C_2$  respectively and calculate their mean  
221 pairwise cosine distance for 100 times. If at least 50% of those 100 subsampled comparisons fall  
222 above the threshold  $c$ , it is considered as evidence for the two cohorts stemming from different  
223 syndromes. The approach was tested on the validation fold not used in the derivation of  $c$   
224 comprising 66 syndromes. The method correctly detected two cohorts stemming from the same  
225 syndrome in 80.30% of the comparisons and correctly identified two cohorts stemming from  
226 different syndromes in 91.98% of the comparisons.

227

## 228 **Rating scales**

229 The Vineland-3 Comprehensive Interview Form was administered to the parents by one  
230 psychologist (E.I.), and provides norm-referenced scores at three levels: subdomains, domains,

231 and the overall Adaptive Behavior Composite (ABC). Adaptive behavior subdomains make up  
232 the most fine-grained score level. The primary norm-referenced scores for the subdomains are  
233 v-scale scores, which have a mean of 15 and standard deviation (SD) of 3. The v-scale score  
234 for each subdomain is included in the narrative interpretation. Standard scores have a mean of  
235 100 and SD of 15. Confidence intervals reflect the effects of measurement error and provide, for  
236 each standard score, a range within which the proband's true standard score falls with a certain  
237 probability or confidence. The confidence level chosen for the report is the 90% confidence  
238 interval. A percentile rank is the percentage of individuals in the age group who scored the  
239 same or lower than the proband. For example, a percentile rank of 41 indicates that the  
240 examinee scored higher than (or the same as) 41% of the age-matched norm sample.

241

## 242 **Results**

243 An in-person assessment was performed on nine families with *NAA10* variants from  
244 October 2019 – March 2020 and an additional 26 families with *NAA10* variants were interviewed  
245 by videoconferencing from April 2020 until September 2020 due to the COVID19 pandemic. All  
246 families seen by September 2020 were scheduled for cognitive evaluations by one qualified  
247 psychologist (E.I.). For families with *NAA15* variants, none of the families were seen in-person  
248 prior to pandemic onset and ten families were seen via videoconferencing from April 2020 until  
249 September 2020, also with referral for cognitive evaluation. After this time, from October 2020  
250 until July 2021, an additional 20 families with *NAA10* variants and 9 families with *NAA15*  
251 variants were seen via videoconferencing, and cognitive evaluations are being conducted on an  
252 ongoing basis for these families. One other family with a recently deceased child with a *NAA10*  
253 variant provided extensive medical records and consent to publish but was unable to meet for  
254 videoconferencing. All summary data and percentages for phenotype data for these and other  
255 published (and some unpublished) *NAA10* and *NAA15* cases was curated at the Human  
256 Disease Gene website series <sup>30</sup>, under the gene names *NAA10* and *NAA15*, at the following

257 links using the “Graph and Chart” tab:

258 <https://humandiseasegenes.nl/naa10/>

259 and

260 <https://humandiseasegenes.nl/naa15/>

261

262 The data were downloaded from the website on May 2, 2022; these results are shown in

263 **Supplementary Table 1** (an excel file, with tabs for *NAA10* and *NAA15*). The website series is

264 meant to be an open-source venue for such data<sup>30</sup>. World maps showing the location of the

265 cases for *NAA10* and *NAA15* are included in the public-facing portion of the websites.

266

267 *NAA10* and *NAA15* variants

268 The numbering of individuals and the variants are shown in **Figure 1, Supplementary Table 2**

269 for *NAA10* and in **Supplementary Table 3** for *NAA15*. The overwhelming majority of individuals

270 seen were female, where one missense variant (c.247C>T, p.Arg83Cys) in *NAA10* occurs more

271 frequently and is most recurrent in females, totaling to 25 females seen in this study. However,

272 consistent with this X-linked disease being more severe in males, one male (Individual 9) with

273 the p.Arg83Cys missense in *NAA10* died at 11 months of age. Other variants were recurrent,

274 but at a much lower frequency, including p.Tyr43Ser, p.Ile72Tyr, p.Ala87Ser, p.Phe128Leu, and

275 p.Met147Thr. In this cohort of individuals, novel variants include: p.His16Pro, p.Tyr31Cys,

276 p.Ala104Asp, p.Arg116Trp, p.His120Pro, p.Leu121Val, p.Ser123Pro, p.Phe128Ser

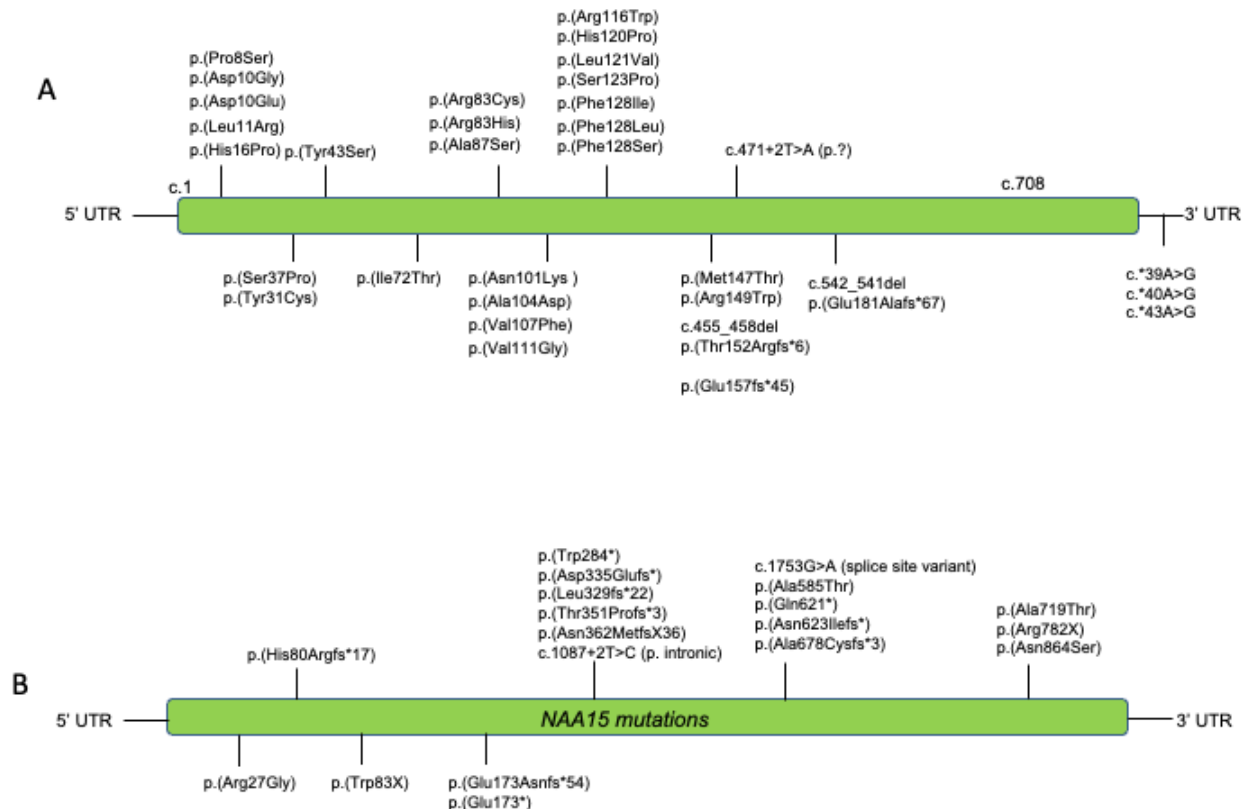

277

278 **Figure 1. Pathogenic variants in *NAA10* and *NAA15* reported herein.** Abbreviations: UTR:  
 279 untranslated region.

280

281 (same position as p.Phe128Leu), p.Thr152Argfs\*6, and p.Glu181Alafs\*67. New information was  
 282 gathered on every individual reported herein, while a shorter summary was published previously  
 283 describing some of these individuals with *NAA10* variants (specifically individuals 8, 11, 13-21,  
 284 35-38, 41, 47, and 51)<sup>20</sup>.

285

286 One child (Individual 1) was found to have two *de novo* variants on the same sequencing  
 287 reads: [c.22C>T;30C>G] p.[Pro8Ser;Asp10Glu]. The c.022C>T variant affects the first base of  
 288 exon 2 with possible interference on the splicing of messenger RNA. Clinical studies of the  
 289 messenger RNA expression in the patient confirmed that mRNA from this allele was not present  
 290 (**Supplementary Figure 1**). The clinical presentation for this child is very similar to many other  
 individuals with other *NAA10* variants, further supporting a haploinsufficiency model in which

291 loss of function of one allele seems to mirror the effects of missense variants in other  
292 individuals.

293 Most of the *NAA10* variants are *de novo*, with the exception of p.Tyr43Ser in a  
294 previously reported family<sup>38</sup>, p.Ile72Thr in two families (one of which, Individual 8, was  
295 previously reported<sup>20,23</sup> and Individual 54 with frameshift variant p.Thr152Argfs\*6, with this  
296 same p.Thr152Argfs\*6 variant being reported in two other cases<sup>20,39</sup>.

297 For *NAA15*, further information about the variants is supplied in **Supplementary Table**  
298 **3**. Two of these individuals (4 and 19) were published previously and referred to as Individuals  
299 14 and 21 in that paper<sup>28</sup>. Almost all variants are *de novo*, with the exception of a splice site  
300 variant with an unknown inheritance pattern.

301 As of April 2022, there are 58 putative missense or in-frame deletion, substitution or  
302 insertion variants in *NAA10* and 64 putative missense or in-frame deletion, substitution or  
303 insertion variants in *NAA15* submitted to ClinVar, with many of these listed as variants of  
304 uncertain significance (**Supplementary Table 4**). The bioinformatic analyses described in the  
305 Methods section reports consensus classification for each variant, with an upgrade to  
306 pathogenic for several of these. However, many of these entries come from clinical laboratories,  
307 with very little uploaded phenotype information, and future work will involve an attempt to  
308 contact and interview these other families. Of course, all of the information in ClinVar is de-  
309 identified, so this requires contacting the clinical testing laboratories and/or other sources of the  
310 data, and then getting referred to the clinicians who are involved in these cases. For now, it is  
311 worth at least cataloging what is currently in ClinVar, along with the new bioinformatic  
312 annotations.

313

### 314 **Clinical Features**

315 Although some variants will be discussed in detail below, most individuals with variants  
316 involving either *NAA10* or *NAA15* have variable degrees of neurodevelopmental disabilities,

317 including impaired motor abilities (HP:0001270), ID (HP:0001249), impaired verbal abilities  
318 (HP:0000750) and autism spectrum disorder (ASD) (HP:0000729) (**Table 1**). These data include  
319 previously published cases with variants in *NAA10*, so the overall numbers are greater than just  
320 the families that were videoconferenced. Due to having only one X-chromosome, the males with  
321 variants in *NAA10* are usually much more severely affected with cardiac issues to the point where  
322 some of these individuals died in infancy. However, it is notable that one male, Individual 7 with  
323 p.Ile72Thr has no apparent cardiac issues and his level of functioning (as assessed by Vineland-  
324 3) was better than some of the females. This is in contrast to a different child (Individual 8) with  
325 the exact same variant who experienced a sudden cardiac death around 5 years of age and had  
326 prior development of a medulloblastoma<sup>20</sup>. In the cohort, the only other individual developing any  
327 type of cancer was Individual 2 with a p.His16Pro missense in *NAA10*, with leukemia cured by  
328 chemotherapy, although a case report of a child with the same exact variant did not report any  
329 leukemia or other cancers<sup>19</sup>. As such, this very low level of cancer with just one case of  
330 medulloblastoma and one case of leukemia in this current cohort could be explained simply by  
331 coincidence or other unknown genetic causes not yet identified, but, given the literature regarding  
332 the involvement of *NAA10* perhaps in cancer development<sup>40</sup>, this likely warrants further  
333 investigation. Overall, individuals with *NAA10* variants more often have much more impaired  
334 motor function, including fine motor difficulties, abnormality of movement, motor delay, and  
335 hypotonia, in comparison to individuals with *NAA15* variants.

336

337

338 **Table 1. Phenotype feature frequency in Individual with NAA10 variants**

| System            | Feature                                                   | Prevalence (% positive/(negative + unknown)) |
|-------------------|-----------------------------------------------------------|----------------------------------------------|
| Neurologic        | •Intellectual disability                                  | 92/95 (96.8%)                                |
|                   | •Delayed speech                                           | 91/95 (95.8%)                                |
|                   | •Motor delay                                              | 89/95 (93.7%)                                |
|                   | •Developmental delay                                      | 77/95 (81.1%)                                |
|                   | •Hypotonia                                                | 57/95 (60.0%)                                |
|                   | •Seizures                                                 | 34/95 (35.8%)                                |
|                   | •Corpus callosum hypoplasia                               | 27/95 (28.4%)                                |
|                   | •Microcephaly                                             | 25/85 (26.3%)                                |
|                   | •Periventricular leukomalacia                             | 17/95 (17.9%)                                |
| Psychiatric       | •Harming behaviors (self or others)                       | 37/95 (38.9%)                                |
|                   | •Attention deficits                                       | 31/85 (32.6%)                                |
|                   | •Eye contact deficits                                     | 28/95 (29.5%)                                |
|                   | •Autistic behavior                                        | 26/85 (27.4%)                                |
|                   | •Compulsive behavior                                      | 16/95 (16.8%)                                |
|                   | •Impulsive behavior                                       | 11/95 (11.6%)                                |
| Cardiovascular    | •Prolonged QT interval                                    | 17/95 (17.9%)                                |
|                   | •Atrial septal defects                                    | 17/95 (17.9%)                                |
|                   | •Ventricular septal defects                               | 13/95 (13.7%)                                |
|                   | •Hypertrophic cardiomyopathy                              | 9/95 (9.5%)                                  |
|                   | •Arrhythmias                                              | 9/95 (9.5%)                                  |
|                   | •Murmurs                                                  | 8/95 (8.4%)                                  |
|                   | •Cardiac arrest                                           | 6/95 (6.3%)                                  |
| Respiratory       | •Neonatal respiratory distress                            | 14/95 (14.7%)                                |
|                   | •Pneumonia & other recurrent upper respiratory infections | 14/95 (14.7%)                                |
|                   | •Apnea                                                    | 5/95 (5.3%)                                  |
|                   | •Pulmonary hypertension                                   | 5/95 (5.3%)                                  |
|                   | •Bronchiolitis                                            | 4/95 (4.2%)                                  |
| Gastrointestinal  | •Feeding difficulties in infancy                          | 57/95 (60.0%)                                |
|                   | -Gastrostomy tube feeding                                 | 12/95 (12.6%)                                |
|                   | -Nasogastric tube feeding                                 | 10/95 (10.5%)                                |
|                   | •Feeding difficulties after infancy                       | 40/95 (42.1%)                                |
|                   | •Dysphagia                                                | 27/95 (28.4%)                                |
|                   | •Gastroesophageal reflux                                  | 21/95 (22.1%)                                |
|                   | •Vomiting                                                 | 19/95 (20.0%)                                |
|                   | •Bowel incontinence                                       | 16/95 (16.8%)                                |
|                   | •Constipation                                             | 9/95 (9.5%)                                  |
|                   | •Diarrhea                                                 | 7/95 (7.4%)                                  |
| Eye abnormalities | •Abnormal eyelashes                                       | 42/95 (44.2%)                                |
|                   | •Thick eyebrows                                           | 35/95 (36.8%)                                |
|                   | •Abnormal palpebral fissure                               | 22/95 (23.1%)                                |
|                   | •Strabismus                                               | 18/95 (18.9%)                                |
|                   | •Hypertelorism                                            | 17/95 (17.9%)                                |

|                       |                                                                                                                                                                                                                                                                                                                                                                                                                                                                                                                                                                                                                                                               |                                                                                                                                                                                                                                                                              |
|-----------------------|---------------------------------------------------------------------------------------------------------------------------------------------------------------------------------------------------------------------------------------------------------------------------------------------------------------------------------------------------------------------------------------------------------------------------------------------------------------------------------------------------------------------------------------------------------------------------------------------------------------------------------------------------------------|------------------------------------------------------------------------------------------------------------------------------------------------------------------------------------------------------------------------------------------------------------------------------|
| Visual abnormalities  | <ul style="list-style-type: none"> <li>•Astigmatism</li> <li>•Myopia</li> <li>•Cortical visual impairment</li> </ul>                                                                                                                                                                                                                                                                                                                                                                                                                                                                                                                                          | <p>22/95 (23.1%)</p> <p>17/95 (17.9%)</p> <p>13/95 (13.7%)</p>                                                                                                                                                                                                               |
| Facial features       | <ul style="list-style-type: none"> <li>•Ear abnormalities               <ul style="list-style-type: none"> <li>-Low-set</li> <li>-Other outer ear abnormalities</li> <li>-Middle and internal ear abnormalities</li> </ul> </li> <li>•Nose abnormalities               <ul style="list-style-type: none"> <li>-Abnormal nasal bridge</li> <li>-Abnormal nasal tip</li> <li>-Ala or nares abnormalities</li> </ul> </li> <li>•Mouth abnormalities               <ul style="list-style-type: none"> <li>-Abnormal philtrum, vermillion</li> <li>-Abnormal palate</li> <li>-Teeth and gingival abnormalities</li> </ul> </li> <li>•Chin abnormalities</li> </ul> | <p>50/95 (52.6%)</p> <p>32/95 (33.7%)</p> <p>35/95 (36.8%)</p> <p>6/95 (6.3%)</p> <p>64/95 (67.4%)</p> <p>39/95 (41.1%)</p> <p>48/95 (50.5%)</p> <p>12/95 (12.6%)</p> <p>69/95 (72.6%)</p> <p>59/95 (62.1%)</p> <p>29/95 (30.5%)</p> <p>29/95 (30.5%)</p> <p>9/95 (9.5%)</p> |
| Metabolic & Endocrine | <ul style="list-style-type: none"> <li>•Sleep disturbance               <ul style="list-style-type: none"> <li>-Sleep apnea</li> </ul> </li> <li>•Abnormality of temperature regulation</li> <li>•Slender build</li> <li>•Hirsutism</li> <li>•Precocious puberty</li> </ul>                                                                                                                                                                                                                                                                                                                                                                                   | <p>28/95 (29.5%)</p> <p>4/95 (4.2%)</p> <p>28/95 (29.5%)</p> <p>25/95 (26.3%)</p> <p>14/95 (14.7%)</p> <p>6/95 (6.3%)</p>                                                                                                                                                    |

339

340 Various levels of ID are reported in almost all study subjects with available data, including

341 mild, moderate or severe ID, and learning difficulties with or without behavioral issues. The

342 severity of the intellectual disability, when known, for *NAA10* and *NAA15* is shown in **Figure 2**

343 and shows that *NAA10* cases are usually much more severe than *NAA15* cases, which is once

344 again consistent with X-linked inheritance for *NAA10*, along with the fact that *NAA10* is the

345 acetyltransferase enzyme, whereas *NAA15* is the dimeric binding partner that helps to localize

346 the NatA complex to the ribosome.

347



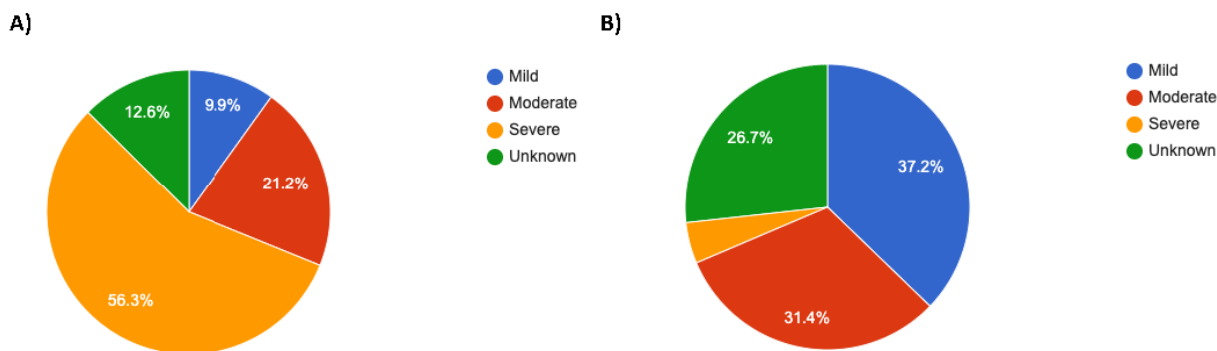

348  
349 **Figure 2. Severity of Intellectual Disability. A) Individuals with *NAA10* variants (n=95); B)**  
350 **Individuals with *NAA15* variants (n=57).**

351  
352 The two male individuals with frameshift variants in *NAA10* (Individuals 55 and 56) are  
353 generally much higher functioning than the other individuals with missense variants. For example,  
354 Individual 56 was reported to be cognitively better than individuals his age (for example, he can  
355 count from 1 to 10 and knows almost all the letters of the alphabet and is only 29 months of age).  
356 Although it was noted that he is a couple of months behind in gross motor skills (he still cannot  
357 run or jump even though he tries. He does attend a typical nursery and the staff report that he is  
358 intelligent, and “he always wants to learn something else”. His teacher says that while she “has  
359 to explain something to individuals in his age 10 times to get them to do it, he already does it the  
360 second time”. These frameshift variants occur toward the C-terminus of the protein, with Individual  
361 56 being the most C-terminal with Glu181Alafs\*67 in *NAA10*. Therefore, it is likely that some  
362 functional N-terminal acetyltransferase enzymatic activity remains.

363 Most individuals with *NAA10* variants have verbal issues including complete absence of  
364 speech, delayed language development, required use of sign language, or other speech  
365 difficulties related to articulation, which some parents report as possibly being connected to low  
366 muscle tone in the pharyngeal muscles. Some research participants also present with either ASD  
367 and/or other behavioral challenges. The birth weight was low ( $\leq$  5th percentile) in a few individuals

368 and it was noted that some individuals failed to grow, causing their weights to fall below the 5th  
369 percentile over time. The percentages for some clinical features are listed in **Table 1** and can be  
370 found on the Human Disease Gene Website series.

371 The most notable new information relates primarily to the development and maturation of  
372 these individuals, as it has become apparent that there are several hurdles to overcome during  
373 development, and that failure to overcome each hurdle significantly impacts the trajectory of  
374 development. First and foremost, these individuals must overcome the neonatal lethality of  
375 possible cardiac arrhythmias and cardiovascular or respiratory complications. This seems to be  
376 more common in males, but one female (Individual 3) with a p.Tyr31Cys missense in NAA10 died  
377 at 6.5 months with such issues after spending some time in the neonatal intensive care unit  
378 (NICU) (see **Supplementary Case** information), which also occurred with male infants in the past,  
379 including the male Individual 9 reported herein. The second hurdle involves feeding difficulties in  
380 infancy including swallowing food and liquids, as some individuals have severe hypotonia, and  
381 ultimately require feeding tube insertions<sup>41</sup>. The third hurdle involves remaining seizure-free, as  
382 it seems that the cognitive development of the individuals is markedly delayed if seizures begin  
383 and are not well-controlled. Lastly, the fourth hurdle involves learning to walk, as some of the  
384 individuals remain wheelchair-bound, due to a lack of coordination and/or an inability to stay  
385 balanced when walking, which seems to also be related to low muscle tone. As such, the clinical  
386 presentation can be quite variable, as someone who requires tube-feeding, is wheelchair bound,  
387 and is suffering from seizures will likely have a far different cognitive outcome than someone who  
388 does not experience these setbacks.

389

### 390 **Facial features**

391 Although it was previously noted that “a recognizable, regular pattern of dysmorphic  
392 facial features was not appreciated amongst the cases”<sup>36,37</sup>, this is debatable now that one  
393 clinician has met and examined these individuals via videoconferencing, as there are commonly

394 seen and sometimes recognizable traits in individuals with *NAA10* variants, including thicker  
395 eyebrows, long eyelashes, upturned nose, and broad nasal bridge (**Table 1, Supplementary**  
396 **Figure 2-4**). While the facial features in the males and females can also be quite variable,  
397 some, including an upturned nose, along with bushy eyebrows and long eyelashes, are quite  
398 common. Eye abnormalities were found in almost all individuals, which sometimes included  
399 large, prominent eyes and large down-slanting palpebral fissures. Other possible features  
400 include delayed closing of anterior and posterior fontanel, presence of a broad and/or  
401 prominent forehead, and sparse anterior scalp hair. The most common ear findings were low-  
402 set ears and large ears, with a broad range of hearing impairment and abnormalities of the outer  
403 ear. Nose features included broad nasal bridge, prominent or broad nasal tip, and anteverted or  
404 flared nares. Lastly, mouth abnormalities were present in a majority of the individuals with a high  
405 palate being the main feature, but there was a range of abnormalities in the vermillion and  
406 philtrum, as well as teeth abnormalities with particular issues with eruption and disorganized  
407 growth. There were several cases with short chins, protruding upper lip, and microretrognathia.

408 Facial feature abnormalities also vary in many individuals with *NAA15* variants  
409 (**Supplementary Figure 5**). The most common are abnormalities of the eyebrows (horizontal,  
410 thick, or long), long eyelashes, hypertelorism, prominent epicanthal folds, abnormalities of the  
411 palpebral fissure, amblyopia, astigmatism, and/or strabismus. Mouth features were also  
412 common with abnormalities of the philtrum (long, short, broad, or smooth), teeth, upper lip  
413 vermillion, chin, and/or presence of a high palate. Abnormalities of the nose included prominent  
414 nasal tip or abnormal nasal bridge. Ear features were least common but presented mostly as  
415 outer ear abnormalities or low-set ears.

416 To investigate further the similarity between the two cohorts based on facial gestalt, we  
417 conducted a facial analysis using the GestaltMatcher approach<sup>41</sup>, using all available facial  
418 photographs for *NAA10* and *NAA15* patients, including previously published cases  
419 (**Supplementary Table 6**). We first utilized tSNE<sup>42</sup> to visualize the distribution of *NAA10* and

420 *NAA15* patients in the two-dimensional space. In **Supplementary Figure 7**, we can see that  
421 *NAA10* and *NAA15* patients do not separate clearly. Moreover, comparing the cohorts *NAA10*  
422 and *NAA15* in the clinical face phenotype space resulted in a mean pairwise cosine distance of  
423  $d(NAA10, NAA15) = 0.9146$  between two patients. The mean pairwise distance falls below the  
424 threshold  $c = 0.9176$  defined to decide whether two cohorts stem from the same syndrome  
425 (mean pairwise cosine distance smaller than  $c$ ) or from two different syndromes (mean pairwise  
426 cosine distance greater than  $c$ ). A subsampling approach yielded that 67% of sampled  
427 subcohorts showed similar phenotypes. Overall, our analysis indicates an overlap in the facial  
428 gestalt of *NAA10* patients and *NAA15* patients (**Supplementary Figure 8**).

429

### 430 **Cardiovascular features**

431 The majority of females and even some males have no obvious cardiac issues.  
432 However, several of the males had structural anomalies of their hearts, including ventricular  
433 septal defect, atrial septal defect, and pulmonary artery stenosis. For those who died,  
434 arrhythmias at the time of death included torsade de pointes, premature ventricular contraction  
435 (PVC), premature atrial contraction (PAC), supraventricular tachycardia (SVtach), and  
436 ventricular tachycardia (Vtach). Death can result from cardiogenic shock following arrhythmia,  
437 which was noted in some affected individuals.

438 Baseline echocardiography is recommended as septal defects have been identified in  
439 several cases. Medical (pharmaceutical) management has been employed to slow the  
440 progression of congestive heart failure (CHF) when manifesting in some individuals.  
441 Electrocardiography (EKG) is also obtained at the time of diagnosis, as fatal dysrhythmias can  
442 develop with time. In several cases, the initial EKG has been normal, with evolution of  
443 arrhythmias during later periods of life. It may be necessary to evaluate on an annual basis and  
444 be vigilant for signs of and symptoms of dysrhythmia/CHF. When present, the arrhythmias have  
445 proven difficult to manage, though the full spectrum of anti-arrhythmics has not been tested.

446 Individuals have responded to episodic cardioversion/defibrillation, but long-term treatment has  
447 not yet been determined. Pacemakers and implantable defibrillators have been used in a few  
448 cases, including in one published family <sup>38</sup>.

449 In addition to gross anatomical defects that subsequently resulted in arrhythmias, EKG  
450 analysis of OS patients has demonstrated a large proportion of patients demonstrating an  
451 elongated QT interval congruent with previously published literature <sup>38</sup>. Our data shows an equal  
452 proportion of patients with elongated QT intervals as patients with atrial septal defects in  
453 patients with variants in *NAA10* (**Table 1**). These seem to be well-controlled with  
454 pharmacotherapy in these patients and caught routinely with Holter monitor assessment.

455

#### 456 **Respiratory features**

457 The vast majority of probands do not have any major respiratory issues, but there are a  
458 few isolated cases of interstitial lung disease and/or respiratory distress (**Table 1**). For example,  
459 Individual 3 with p.Tyr31Cys missense in *NAA10* died in the first year of life with local interstitial  
460 lung disease, neonatal respiratory distress, respiratory failure requiring assisted ventilation,  
461 lymphangiectasia, and pulmonary fibrosis. This included repeated apnea episodes requiring  
462 CPR after one such episode. Radiological CT imaging of the thorax was performed at 6 weeks  
463 of age and reported “ground glass changes throughout both lungs”. The etiology remained  
464 uncertain and a lung biopsy reported mild thickening of the interstitium without significant  
465 interstitial inflammatory infiltrate, but expansion of the inter-lobular septae with lymphangiectasia  
466 and fibrosis. Focal interstitial glycogenosis was confirmed with PAS staining. The Individual 9, a  
467 male with p.Arg83Cys missense in *NAA10*, died around one year of age, also with respiratory  
468 arrest, neonatal respiratory distress, respiratory failure requiring assisted ventilation, tachypnea,  
469 and interstitial lung disease. Of course, the original OS males also had respiratory distress and  
470 frequent pneumonias <sup>13</sup>, seen also in a third family <sup>15</sup>, but these other individuals without primary

471 cardiac arrhythmias seem to demonstrate that this respiratory distress can be primarily caused  
472 by interstitial lung disease, rather than being entirely secondary to cardiovascular complications.

473 As mentioned above, most individuals did not have any notable respiratory issues, but a  
474 recognizable proportion of our cohort did demonstrate a pattern of recurrent respiratory  
475 infections similar to the original OS males<sup>13</sup>, with varying severity and frequency. A larger  
476 proportion of patients with *NAA10* variants had respiratory infections as opposed to individuals  
477 with *NAA15* variants, and this pattern is replicated with the other respiratory features. A few  
478 patients also had neonatal respiratory distress, pulmonary hypertension and/or apnea (such as  
479 Individuals 12, 38, 45, 47 and 56). Given the relative lack of respiratory distress in most cases,  
480 many clinical tests, such as CT scanning and/or lung biopsy were not clinically indicated, so  
481 these data are simply not available. As such, it is not known if these individuals never had any  
482 interstitial lung disease or if they perhaps had a mild case which subsequently resolved over  
483 time. In this regard, it was written that one female with p.His16Pro in *NAA10* needed postnatally  
484 to “have an oxygen mask applied at night because of oxygen desaturations”, and “because of  
485 symptoms resembling interstitial lung disease (chronic tachy-dyspnea, recurrent pneumonia and  
486 bronchitis), a lung biopsy was performed at the age of 3 years without revealing any specific  
487 findings”<sup>40</sup>. As such, it is possible that some of these individuals might have interstitial lung  
488 disease neonatally, but that in many cases, this might resolve over time.

489

#### 490 **Gastrointestinal features**

491 The gastrointestinal pathology associated with OS, in order from most to least prevalent,  
492 includes feeding difficulties in infancy, dysphagia, GERD/silent reflux, vomiting, constipation,  
493 diarrhea, bowel incontinence, and presence of eosinophils on esophageal endoscopy. The  
494 percentages for some of these are shown in **Table 1** and/or are available on the Human  
495 Disease Gene website series. Additionally, the gastrointestinal symptom profile for individuals  
496 with this syndrome has been expanded to include eosinophilic esophagitis, cyclic vomiting

497 syndrome, Mallory Weiss tears, abdominal migraine, esophageal dilation, and subglottic  
498 stenosis <sup>41</sup>. A recent analysis including nine G-tube or GJ-tube fed probands demonstrated that  
499 G/GJ-tubes are overall efficacious with respect to improvements in weight gain and caregiving  
500 <sup>41</sup>. A recommendation has been made that OS individuals not tracking above the failure to thrive  
501 (FTT) range past 1 year of age should promptly undergo G-tube placement to avoid prolonged  
502 growth failure. If G-tubes are not immediately helping to increase weight gain after insertion,  
503 recommendations include altering formula, increasing caloric input, or exchanging a G-tube for  
504 a GJ-tube by means of a minimally invasive procedure.

505

### 506 **Growth, including height, weight and head circumference**

507 Many of the OS individuals and a few of the individuals with *NAA15* variants have low  
508 height and weight, as detailed in a recent study <sup>41</sup>. As demonstrated in that study, poor growth  
509 could not entirely be explained by inadequate caloric intake, inability to properly chew or  
510 swallow, growth hormone deficiency, or low appetite; past the age of 6-12 months, calorie  
511 tracking, caloric supplementation, and using feeding therapy to successfully teach individuals  
512 how to chew, swallow, and no longer choke on food did not induce adequate weight gain. Low  
513 appetite was also not an observable cause of poor growth, as multiple proband parents claimed  
514 that their individuals had great appetites, were constantly hungry, and that “desire to eat has  
515 never been a problem.” Growth hormone deficiency was treated with growth hormone (GH)  
516 administration in two probands but these efforts kept these probands in the failure to thrive  
517 (FTT) range, despite some slight weight improvements. Effect of GH administration on weight  
518 gain among GH-deficient OS individuals with growth failure should be further investigated in  
519 subsequent studies.

520

### 521 **Endocrine and Metabolic features**

522           Some of these features are shown in **Table 1**. Extensive laboratory panels assessing  
523 digestive function, screening for metabolic decompensation, and hormonal dysregulation have  
524 not been significantly useful in improving the care or outcome for these individuals. Although  
525 some parents report that their children are quite lean with thermoregulation abnormalities, there  
526 is no metabolic or quantitative data yet to prove this claim. Although evidence from mouse  
527 models<sup>43</sup> indicates dysregulation of glucose and insulin levels, the one human proband  
528 (Individual 46) tested thus far with extensive glucose monitoring over 14 days did not show any  
529 major abnormalities. Mouse models also show decreased brown adipose tissue, which might  
530 offer an explanation for the thermoregulation issues<sup>43</sup>, but brown adipose tissue amounts have  
531 not yet been assessed in affected individuals, particularly as there are logistical challenges with  
532 getting children and adults with severe intellectual disability to cooperate with imaging exams  
533 and it is very difficult to justify the use of sedation in a research setting. It is therefore up to each  
534 individual treating clinician to decide whether to pursue clinical testing to explore whether these  
535 individuals are indeed lean and/or have decreased brown adipose tissue.

536           There are occasional findings in particular individuals that may or may not be related to  
537 the variants in *NAA10* or *NAA15*. For example, Individual 8 with an *NAA15* variant has been  
538 found to have corneal calcifications and persistent serum hypercalcemia, although there is no  
539 other laboratory-based evidence for hyperparathyroidism.

540

#### 541 **Ophthalmologic and visual features**

542           The majority of *NAA10* individuals present with visual abnormalities, which often include  
543 astigmatism, myopia, strabismus, and/or amblyopia (also see **Table 1**). Further, there are a  
544 subset of individuals who have exotropia/esotropia, microphthalmia, are blind, and/or have  
545 abnormalities to the optic disc or nerve. In *NAA15* individuals, visual abnormalities were present  
546 in a small subset as strabismus, amblyopia, astigmatism, and other visual impairment. Many  
547 individuals with this syndrome wear eyeglasses and due to this high prevalence of visual



548 impairment, eye examination by ophthalmology is warranted. Further, thirteen individuals with  
549 *NAA10* variants and one male with p.Asn864Ser in *NAA15* presented with cortical or cerebral  
550 visual impairment (CVI). CVI can be described as a “verifiable visual dysfunction which cannot  
551 be attributed to disorders of the anterior visual pathways or any potentially co-occurring ocular  
552 impairment”<sup>44</sup>. CVI affects the processing of visual information, which has a profound impact on  
553 their ability to learn and must be thoroughly assessed to cater to the unique needs of each child  
554 and their impairment. Generally, most individuals have learning disabilities, and particularly  
555 seem to have difficulty with depth perception and discerning contrast, which may contribute to  
556 their difficulty using stairs or walking off of curbs. CVI was not thoroughly investigated for this  
557 paper and should be further explored with more examinations of these individuals to understand  
558 how their CVI impacts their learning and/or visuomotor abilities.

559 Individual 23 is a female with the common p.Arg83Cys missense in *NAA10*, yet she is the  
560 only female published to date who was born with microphthalmia, with a very small right eyeball  
561 along with a smaller, misshapen pupil, leading to the need for a prosthetic eyeball (see  
562 **Supplementary Figure 2**). She also has stigmatism in her left eye, along with myopia and  
563 possible cortical visual impairment. Her exome sequencing did not reveal any other possible  
564 cause for the microphthalmia. Individual 54 (a male) with p.Thr152Argfs\*6 in *NAA10* also has  
565 microphthalmia (see **Supplementary Figure 3**), similarly to a previously published case<sup>39</sup>,  
566 whereas the male in Japan did not have microphthalmia<sup>44</sup>. Individual 55 has p.Glu181Alafs\*67  
567 and does not have microphthalmia, indicating that even frameshift variants toward the C-terminus  
568 of *NAA10* can have quite variable outcomes.

569 After the posting of an earlier version of this manuscript as a preprint<sup>45</sup>, one clinician  
570 (A.C.) reported to us the discovery of one female (19 years old, Individual 20 in Supplementary  
571 Information) with unilateral microphthalmia with a *NAA15* variant (NM\_057175.4:c.852G>A  
572 p.(Trp284\*), heterozygous). This is further proof that the expression of many phenotypes is  
573 likely titrated by the overall amounts of monomeric *NAA10* and/or NatA activity, whereby

574 microphthalmia occurs in both syndromes when some threshold is crossed during development  
575 in which likely some substrate is not acetylated enough.

576

### 577 **Neurologic features**

578         The prototypical subject displays intellectual disability, global developmental delays,  
579 gross and/or fine motor delay, hypotonia, and speech delay. In many cases speech delay was  
580 severe enough for speech to be considered absent. Additionally, the presence of tonic-clonic  
581 seizures was not uncommon. Virtually all individuals have neonatal hypotonia, and several had  
582 neurogenic scoliosis. For Individual 45, intervention for neurogenic scoliosis was attempted with  
583 placement of rods. The percentages for some of the neurologic features are shown in **Table 1**  
584 and/or are listed on the Human Disease Gene website series.

585         Neuroimaging has been obtained in a number of these individuals, primarily to screen for  
586 brain anomalies associated with their hypotonia and growth failure, and there is a paper in  
587 preparation regarding detailed analysis of brain MRI findings. The majority possessed at least  
588 one brain abnormality with corpus callosum hypoplasia and microcephaly being by far the most  
589 common findings followed by periventricular leukomalacia (see **Supplementary Table 1** for  
590 exact figures). In some cases, there was a finding of cerebral atrophy. However, there was no  
591 radiographic evidence to explain their hypotonia or growth failure. It seems warranted to obtain  
592 brain MRI with diffusion tensor imaging, to check for white matter delays, in the first few years of  
593 life, and then a follow-up MRI around puberty. Given that some of the individuals develop  
594 seizures, it seems that baseline EEG should be obtained to check for any seizure activity and,  
595 ideally, an annual EEG, or at least one every 2-3 years, should be performed up until their early  
596 20's. Prophylactic treatment with anti-epileptic medication should be considered if EEG shows  
597 any possible seizures. Lastly, given that some of the individuals have developed autism, it is  
598 recommended to perform standard autism screening assessments during childhood, which can

599 include Autism Diagnostic Inventory (ADI) or Autism Diagnostic Observation Schedule (ADOS-  
600 2) screening.

601

## 602 **Cognitive and psychiatric features**

603 The psychiatric profile of subjects with OS typically includes harmful behavior which is  
604 either outwardly directed (agitation or violent behavior toward others) or inwardly directed / self-  
605 injurious (hair pulling, self-biting, head-banging, etc) in addition to impulsive or compulsive  
606 behavior. The presence of any combination of short attention span, poor eye contact, and  
607 autistic, stereotyped or repetitive behaviors (tics, hand-wringing, hand-flapping, etc) were  
608 common. The percentages for some of these features are shown in **Table 1** and/or are available  
609 on the Human Disease Gene website series.

610 Vineland-3 functional assessment revealed substantial variability among the *NAA10* and  
611 *NAA15* probands, although the overall level of functioning for the *NAA15* probands was  
612 significantly higher than the *NAA10* probands (**Figure 3A, Supplementary Table 5**). This is  
613 consistent with the results presented previously in **Figure 2** demonstrating that more *NAA10*  
614 probands were given a “severe” intellectual disability diagnosis. When the results for *NAA10*  
615 were separated by sex, inheritance pattern, and variant type, it became clear that the frameshift  
616 variants located toward the C-terminal end of *NAA10* have much less impact on overall  
617 functioning. One of the males (Individual 7) with a maternally inherited missense variant  
618 (c.215T>C, p.Ile72Thr) in *NAA10* had an almost normal level of functioning, with an ABC  
619 standard score of 94, which is less than one standard deviation away from the “normal” of 100.  
620 However, Individual 8 (now deceased) had the exact same variant, but his ABC standard score  
621 was 59, demonstrating again that there is substantial variability even among the exact same  
622 variants. For the females with the p.Arg83Cys missense in *NAA10*, there is also substantial  
623 phenotypic variability with functioning as well, which appears to be equivalent in scope to the  
624 many other variants in females (**Figure 3B**). As such, there are clearly other factors affecting

625 the overall trajectory of these individuals, in addition to just the one variant they have in *NAA10*  
626 or *NAA15*, which as mentioned above could include, among other things, the cardiac  
627 arrhythmias, feeding difficulties, delayed speech, delayed motor development, seizures, and  
628 cortical visual impairment. Comprehensive analyses of the many different Vineland sub-scale,  
629 age-equivalent scores (AES), and growth-scale values (GSVs)<sup>46</sup> falls outside the scope of the  
630 current paper and will be reported in a future paper.  
631

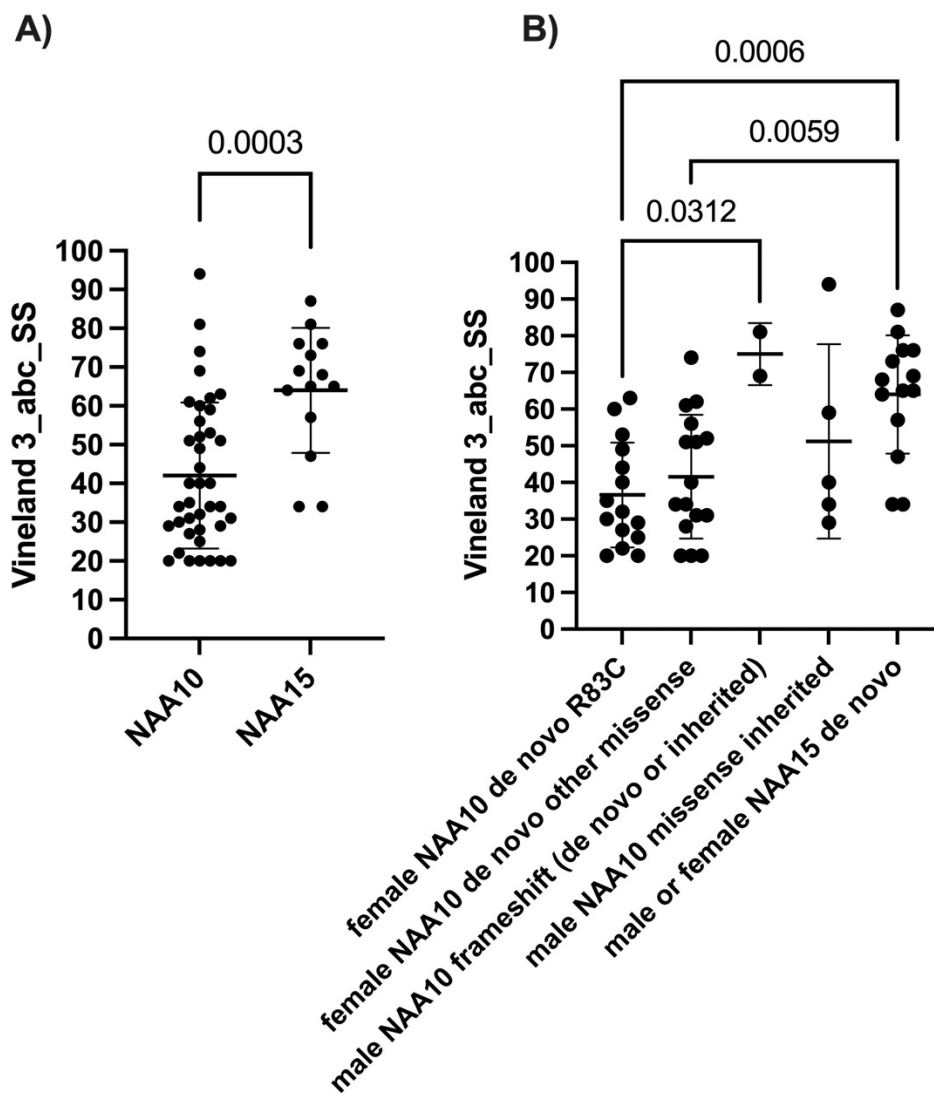

632

633 **Figure 3. Vineland results.** Adaptive Behavior Composite (ABC) Standard scores have a mean

634 of 100 in the “normal” population and SD of 15. **A)** All scores are plotted for *NAA10* and *NAA15*,

635 without regard for sex, inheritance pattern, or type of variant. **B)** These same scores are now

636 separated out by sex, inheritance pattern and type of variant. In the case of *NAA15*, which is an

637 autosomal gene, the sexes are still grouped together.

638

639

640

## 641 **Human Phenotype Ontology-based clustering analyses**

642 Hierarchical clustering analyses were performed using the HPO terms downloaded from  
643 the Human Disease Gene website series in October 2022 (see **Supplementary Table 1**). The  
644 two syndromes for *NAA10* and *NAA15* do cluster separately, albeit with some overlap (see  
645 **Supplementary Figure 6**). Most importantly, and consistent with the clinical impression of  
646 these two syndromes, there was no obvious sub-clustering among the different variants within  
647 each syndrome. This provides quantitative and supportive data regarding the phenotypic  
648 spectrum for the presentation for variants in *NAA10* and *NAA15*, and this is also consistent with  
649 the presentation of *NAA15*-related neurodevelopmental syndrome being somewhat distinct (and  
650 usually much more mild) than *NAA10*-related neurodevelopmental syndrome.

651

## 652 **Molecular Analysis of the Variants**

653 Most *NAA10* variants identified to date in *NAA10*-related neurodevelopmental diseases  
654 reduce *NAA10*- and *NatA*-type activity<sup>20</sup>. Although novel variants clinically described here have  
655 not been characterized biochemically, it is possible to anticipate biochemical implications  
656 resulting from variants in the conserved region of *NAA10* (residues 1-160) based on previous  
657 studies<sup>13,16,18–21,23,32,33</sup>. However, variants and truncations occurring in the C-terminus of *NAA10*  
658 require additional studies to understand the role of the *NAA10* C-terminal domain. The  
659 observation that frameshifts occurring at the C-terminal region of *NAA10* are associated with a  
660 lower impact on cognitive function is consistent with the conserved *NAA10* domain being the  
661 minimal region necessary for *in vitro* activity.

662 To contextualize the phenotypes associated with the *NAA10* and *NAA15* mutant  
663 proteins, we inspected two published human *NatA* crystal structures: the heterodimeric complex  
664 composed of the *NAA10* and *NAA15* subunits (PDB: 6C9M) and the heterotrimeric complex  
665 composed of *NAA10*, *NAA15*, and the regulatory subunit, *HYPK* (PDB: 6C95). Based on these  
666 structures, the *NAA10* variants p.Pro8Ser/Asp10Glu, p.Tyr31Cys, p.His120Pro, p.Ser123Pro,

667 p.Phe128Ser, and p.Arg149Trp would likely compromise the folding and/or thermal stability of  
668 NAA10 (**Figure 4**)<sup>5</sup>. Specifically, the mutations to proline (p.His120Pro, p.Ser123Pro) occur in  
669 helices, likely destabilizing the helical structure, and the p.Tyr31Cys and p.Phe128Ser  
670 mutations likely disrupt hydrophobic core interactions that are mediated by Tyr31 and Phe128.  
671 The double variant, [c.22C>T;30C>G] p.[Pro8Ser;Asp10Glu] in the exon/intron boundary, leads  
672 to a reduction in NAA10 formation by altering the splicing of the mRNA from this allele  
673 (**Supplementary Figure 1**).

674 The biochemistry of the p.Arg83Cys variant is unique amongst the NAA10-type variants.  
675 The monomeric NAA10 p.Arg83Cys protein is less active than wild type NAA10<sup>33</sup> and the  
676 heterodimeric p.Arg83Cys NatA complex was found have enhanced activity, while HYPK  
677 binding returns p.Arg83Cys NatA activity back to wild type levels<sup>20</sup>. In the context of the  
678 heterodimeric NatA complex, the binding of acetyl CoA to p.Arg83Cys NAA10 is compromised,  
679 as indicated by the loss of acetyl CoA-mediated stabilization<sup>20</sup>. For the wild type NAA10, the  
680 positively charged p.Arg83Cys side chain interacts with the negatively charged acetyl CoA  
681 pantothenic arm, which would be absent with the Cys variant. In addition, it is possible that this  
682 complex NatA phenotype arises from the formation of a disulfide bond between NAA10  
683 p.Arg83Cys with the nearby NAA15 p.Cys322 residue. This disulfide bond has been proposed  
684 to anchor the complex so that the complex is better positioned to catalyze the N-terminal  
685 acetylation reaction. This disulfide bond would not form in the monomeric NAA10 state,  
686 rendering mutant NAA10 p.Arg83Cys less active than the wild type monomeric NAA10.  
687  
688

689

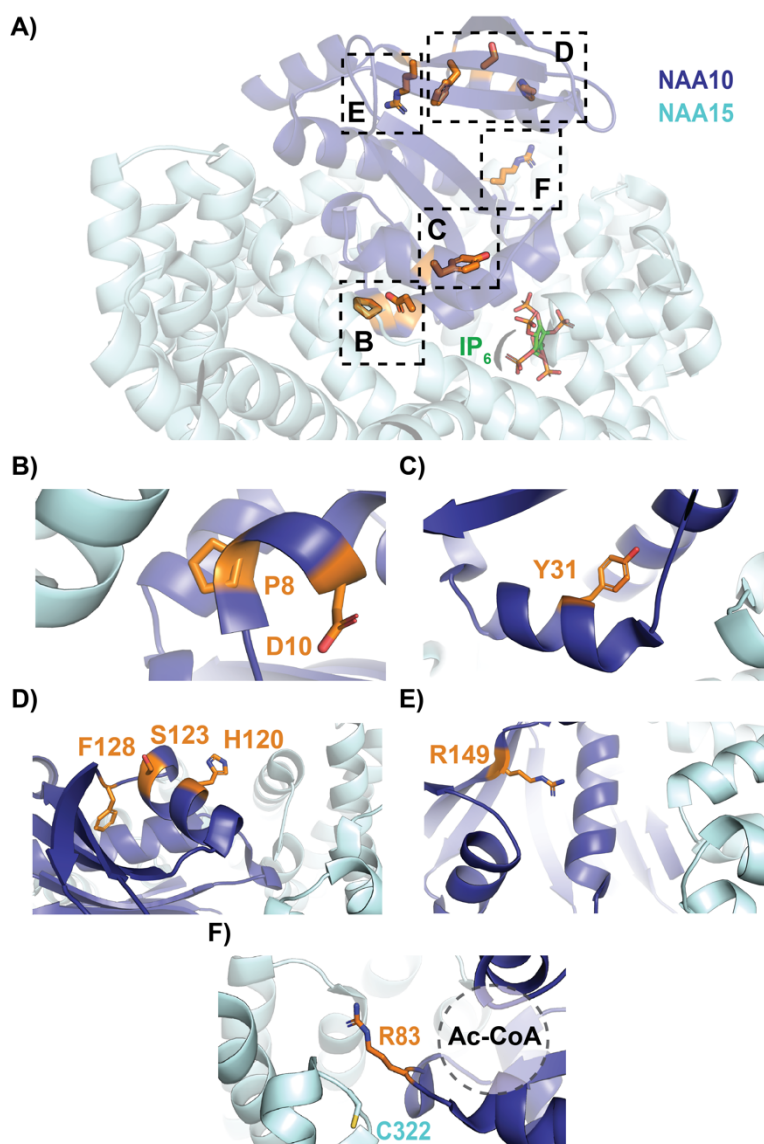

690

691 **Figure 4. Crystal structure of human NaA complex labeled with relevant NAA10 residues.**

692 NAA10 (dark blue) and NAA15 (light cyan) are shown in cartoon with wild-type residues in stick

693 (orange). **A)** Top view of complex annotated with relevant NAA10 residues outlined by dashed

694 boxes: **B)** P8 and D10; **C)** Y31; **D)** H120, S123, and F128; **E)** R149; and **F)** R83 and NAA15

695 C322 (light cyan, stick), where the acetyl CoA binding pocket is indicated by a dash-outlined

696 circle.



697 In contrast to the reported *NAA10* variants, *NAA15* variants tend to confer a range of  
698 biochemical and biophysical effects on NatA function<sup>20</sup>. Similar to *NAA10* variants, several  
699 novel variants have been included that have not yet been biochemically characterized  
700 (p.Arg27Gly, p.Ala585Thr, p.Ala719Thr, and p.Asn864Ser). Variants occurring in *NAA15* could  
701 affect *NAA15* folding and/or thermostability, as well as intermolecular interactions with *NAA10*  
702 (directly or through a bridging inositol hexaphosphate, IP<sub>6</sub>, molecule) or HYPK – and, thereby,  
703 NatA catalytic activity, or NatA localization to the ribosome.

704 Based on structural considerations of the human NatA and NatA/HYPK crystal structures  
705 (**Figure 5**) and previous *in vitro* studies,<sup>46</sup> we anticipate that the *NAA15* p.Lys450Glu mutant  
706 would disrupt the *NAA10*-IP<sub>6</sub> interaction and, thus, destabilize the *NAA10*/*NAA15* complex,  
707 while the p.Lys338Asn mutant could disrupt *NAA15* thermostability by disrupting a hydrogen  
708 bond between two adjacent helices in *NAA15*. p.Ala585Thr is disordered in both crystal  
709 structures and mutants p.Arg27Gly and p.Asp112Asn are solvent-exposed on *NAA15*, so it is  
710 unclear how these mutations impact NatA function. However, it is possible that they disrupt the  
711 NatA-ribosome interaction. In particular, p.Arg27 and p.Ala585 are both located in regions  
712 previously implicated in ribosome-binding, thereby altering NatA co-translational activity<sup>47</sup>.  
713 P.Ala719Thr is buried within a bundle of helices in the metazoan-conserved *NAA15* C-terminus,  
714 which is critical for NatA heterodimer stabilization and HYPK regulatory subunit binding.<sup>47</sup>  
715 Finally, the molecular basis for the p.Asn864Ser mutant is unclear because published NatA  
716 structures are not resolved past residue 841. However, there are two published phosphorylation  
717 sites p.Ser855 and p.Ser856 in this region that have not been evaluated but may be impacted  
718 by this variant.

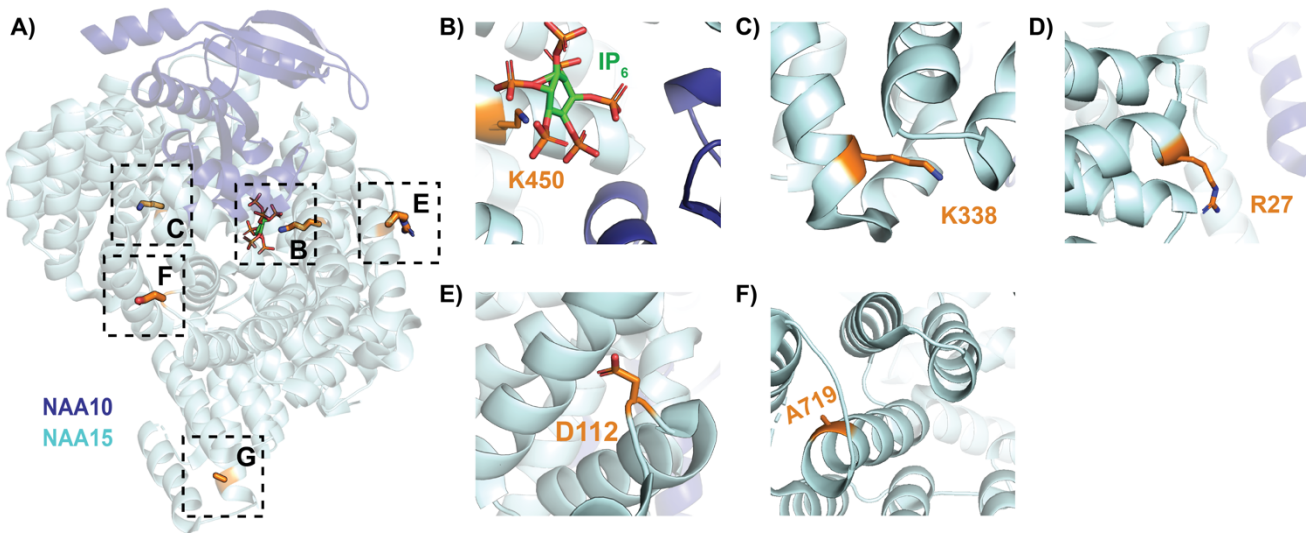

719

720 **Figure 5. Crystal structure of human NatA complex labeled with relevant NAA15 residues.**

721 NAA10 (dark blue) and NAA15 (light cyan) are shown in cartoon with wild-type residues in stick

722 (orange). **A)** Side view of complex annotated with relevant NAA15 residues outlined by dashed

723 boxes: **B)** K450 with bound inositol hexaphosphate (IP<sub>6</sub>, stick); **C)** K338N; **D)** R27; **E)** D112; and

724 **F)** A719.

725

726

727 **Discussion**

728 Mendelian diseases are anything but simple, as the presentations can be quite complex  
729 and variable due to modification by genetic background and environmental influences<sup>48</sup>. This is  
730 quite apparent in the case of *NAA10*-related neurodevelopmental syndrome, as the variability is  
731 enormous, with different trajectories that are impacted by whether the child overcomes certain  
732 hurdles, such as learning to feed themselves and to walk. Males with *NAA10*-related  
733 neurodevelopmental syndrome may have symptoms at different ages: those with arrhythmias or  
734 other serious cardiac conditions may be embryonic lethal; others are apparent at birth  
735 experiencing cardiac concerns, hypotonia and dysmorphic features; and others come to  
736 attention later with relatively nonspecific developmental/intellectual and growth impairments.  
737 Likewise, some females can present with similar issues as males, including rarely  
738 microphthalmia and/or prolonged QT interval, and the majority of the females with *NAA10*  
739 variants have severe to profound intellectual disability, whereas the individuals with *NAA15*  
740 variants are much less severely impaired (see **Figure 3**).

741 An area for future investigation concerns the amount of physical, speech, occupational,  
742 and other therapies that should be recommended. Based on these extensive interviews with the  
743 families, the anecdotal information seems to suggest that individuals with *NAA10*-related  
744 neurodevelopmental syndrome benefit from the following therapies on at least a weekly basis in  
745 at least the first 7 years of life, so as to ensure that they can eat, walk, and ideally verbalize:  
746 Mobility therapy; speech and language therapy; sensory integration therapy; hydrotherapy;  
747 occupational therapy with a focus on fine motor skills; and cortical visual impairment therapy (if  
748 warranted). The trajectory of these individuals seems to vastly improve with intensive therapy,  
749 whereas some of these individuals do not make adequate progress without adequate therapy.  
750 As mentioned, future studies can investigate this question much more quantitatively with a  
751 natural history study, documenting the exact modalities and frequencies of therapies.

752 One limitation of our study is that only the first nine research participants were  
753 interviewed in-person and physically examined by medical doctors, including by a medical  
754 geneticist, a neurologist, a psychiatrist, and an optometrist. After this time, all interviews were  
755 converted to videoconferencing starting in March 2020, with the onset of the COVID19  
756 pandemic, and the families met with the psychiatrist only (GJL). However, we did not observe  
757 any major differences in the information obtained from the in-person visits as compared to the  
758 videoconference visits, and all visits included review of available medical records. Please see  
759 the **Supplementary Discussion** for additional details.

760 To date, most NAA10 and NAA15 variants have been studied *in vitro* using either  
761 immunopurified overexpressed full-length NAA10 (235 residues) protein from yeast <sup>16</sup> or  
762 mammalian culture <sup>19,21,23</sup>, *S. frugiperda* (*Sf9*)-expressed recombinant NatA complex containing  
763 a C-terminally truncated NAA10 (1-160) <sup>20</sup>, or an affinity-tagged full-length NAA10 expressed in  
764 *E. coli* <sup>48</sup>. Each of these methodologies have their limitations. Protein isolated from mammalian  
765 cell culture offers a unique advantage, where, depending on the immunoprecipitation conditions,  
766 NatA likely co-purifies with relevant binding partners, such as the NatA regulatory protein,  
767 HYPK, and the NatE catalytic subunit, NAA50. However, this does not allow for selective  
768 isolation of the NAA10 catalytic subunit or the NatA complex without either of its binding  
769 partners. By contrast, *Sf9* overexpression of the human NatA complex can be performed with  
770 and without the co-transfection of the HYPK virus to allow for selective production of the NatA  
771 and NatA/HYPK complexes. In addition, it is also possible to prepare purified NatE complex with  
772 or without HYPK<sup>49</sup>. However, this approach has its limitations because the *Sf9*-expressed NatA  
773 complex construct contains a C-terminally truncated NAA10 (1-160 of 235 total residues). This  
774 C-terminal region can be phosphorylated at 6 sites <sup>50</sup>, and could potentially influence the activity  
775 and the stability of NAA10, although the interplay of these phosphorylation events with NAA10  
776 and NAA15 variants has not yet been evaluated. While recombinant NAA10 overexpression in  
777 *E. coli* allows for the studying of the full-length monomeric NAA10, proteins produced in *E. coli*

778 are not post-translationally modified. Overall, these *in vitro* assays are limited in scope as there  
779 could very well be cellular and organismal phenotypes that result from decreased (or otherwise  
780 altered) amino-terminal acetylation of a wide range of substrates.

781 NatA plays a complex role in the cell with a range of functional roles and varying  
782 substrate types, depending on the enzyme's oligomeric state. This is particularly apparent with  
783 the NAA10 p.Arg83Cys variant. The heterodimeric p.Arg83Cys NatA complex has enhanced  
784 activity, HYPK binding returns p.Arg83Cys NatA activity back to wild type levels<sup>20,25,49</sup> while the  
785 monomeric mutant NAA10 features a diminished level of activity<sup>20,25,50</sup>. Despite this, the  
786 phenotype of the individuals with this particular mutation is not appreciably different from the  
787 other individuals reported herein. There are multiple ophthalmologic abnormalities in these  
788 females, and individual 23 is a female with the p.Arg83Cys missense in NAA10, with  
789 microphthalmia, just like Individual 54 (a male) with p.Thr152Argfs\*6 in *NAA10* also with  
790 microphthalmia, and similar in phenotype to previously published cases<sup>20,25,51</sup>. The cognitive  
791 functioning of the females with p.Arg83Cys missense in NAA10 is also similarly impaired as the  
792 other females with different missense changes (**Figure 3**), and there is a phenotypic spectrum  
793 including multiple organ systems in all of these females with missense changes in NAA10.  
794 These pathologies highlight the need to build off the groundwork laid by focused biochemical  
795 studies into model systems that can account for NatA's multiple oligomeric states and cellular  
796 functions. One such multidimensional approach has been to study the human mutations in the  
797 human genes expressed in a *S. cerevisiae* model knocked out for endogenous yeast *Naa10*  
798 and/or *Naa15*<sup>50</sup>. However, this approach has its own caveats. For example, *S. cerevisiae* is a  
799 much simpler unicellular organism that does not represent the complexity of a human cell or a  
800 human being, including the absence of expression of the NatA regulatory subunit, HYPK.  
801 Instead, these mutations are perhaps best studied using patient-derived or cell lines with the  
802 mutations engineered into them, as has been done recently with *NAA15*<sup>51</sup>, and/or with animal  
803 models with the human variants engineered into *NAA10* or *NAA15*.

804 In conclusion, we have presented phenotypic information on many new variants in  
805 *NAA10* and *NAA15*, along with additional phenotypic information on some previously published  
806 *NAA10* variants. We document an extensive phenotypic spectrum caused by likely decreased  
807 expression and/or function of *NAA10* and/or the NatA complex, with the cases involving *NAA10*  
808 variants usually presenting as more severe than cases involving *NAA15*. Although some papers  
809 have also suggested that there might be different allelic presentations or mechanisms of action  
810 for different variants involving *NAA10*, such as with microphthalmia present in males with splice-  
811 site<sup>51</sup> or frameshift<sup>53</sup> variants, the present study demonstrates that this is much more likely to  
812 be a phenotypic spectrum of one unitary disease. Although some do refer to this entire disease  
813 entity as Ogden syndrome, another name could be *NAA10*-related neurodevelopmental  
814 syndrome. The latter name is longer and thus more cumbersome, whereas the name Ogden  
815 syndrome is more memorable and easier to introduce when describing the disease to non-  
816 experts, but the longer name does follow the recently suggested dyadic nomenclature<sup>54</sup>.  
817 Further information about this can be found in **Supplementary Discussion**. We further suggest  
818 that the disease entity involving *NAA15* variants should be labeled as *NAA15*-related  
819 neurodevelopmental syndrome.

820

## 821 **Acknowledgements**

822 The authors would like to thank the Genome Aggregation Database (gnomAD) and the groups  
823 that provided exome and genome variant data to this resource. A full list of contributing groups  
824 can be found at <http://gnomad.broadinstitute.org/about>. Early in the project, Drs. Milen Velinov,  
825 Ricardo Madrid, and Roseanne Ricciardi graciously performed medical genetic, neurology, and  
826 optometry examinations, respectively, on the nine families with *NAA10* variants seen in-person  
827 at the Jervis Clinic. GJL would also like to thank the Clinical and Administrative staff of the  
828 Jervis Clinic for their assistance, and the many clinicians who performed tests and/or wrote

829 medical records that were obtained and summarized. This study has made use of data  
830 generated by Human Disease Genes Website series, [www.humandiseasegenes.nl](http://www.humandiseasegenes.nl).

831

### 832 **Author Contributions**

833 GJL was responsible for all videoconferencing and primary data collection, with secondary  
834 summaries performed by EM, MV, TB, AP, KS, IB, and MT. Data analysis was performed by  
835 GJL MV, TB, and AP. Bioinformatics analyses were performed by QL and KW. In-person  
836 examinations at the Jervis Clinic were aided by MG and KA. Biomedical interpretation of the  
837 human NatA structure were provided by LG and RM. Vineland-3 psychological testing was  
838 performed by EHI. The first draft of the manuscript was written by GJL, MV, TB, and AP, with  
839 input thereafter from all other authors.

840

### 841 **Funding**

842 This work is supported by New York State Office for People with Developmental Disabilities  
843 (OPWDD) and NIH NIGMS R35-GM-133408. NIH grants R01 GM060293 and R35 GM118090  
844 awarded to R.M. and T32 GM071339 grant awarded to L.G. also supported this work.

845

### 846 **Ethical Approval**

847 Both oral and written patient consent were obtained for research and publication, with approval  
848 of protocol #7659 for the Jervis Clinic by the New York State Psychiatric Institute - Columbia  
849 University Department of Psychiatry Institutional Review Board. Written family consent was  
850 given for publication of any photography of the children.

851

852 **Database Deposition and Access**— All data produced in the present study are available upon  
853 reasonable request to the authors. The sequencing data were generated as part of clinical  
854 testing, so the underlying raw data are not consented for deposition to a public database.

855

856 **Competing Interests**

857 The authors do not declare any competing interests.

858

859 **References**

- 860 1. Arnesen, T. *et al.* Proteomics analyses reveal the evolutionary conservation and divergence  
861 of N-terminal acetyltransferases from yeast and humans. *Proc. Natl. Acad. Sci. U. S. A.*  
862 **106**, 8157–8162 (2009).
- 863 2. Starheim, K. K., Gevaert, K. & Arnesen, T. Protein N-terminal acetyltransferases: when the  
864 start matters. *Trends Biochem. Sci.* **37**, 152–161 (2012).
- 865 3. Arnesen, T. *et al.* Identification and characterization of the human ARD1-NATH protein  
866 acetyltransferase complex. *Biochem. J.* **386**, 433–443 (2005).
- 867 4. Arnesen, T. *et al.* The chaperone-like protein HYPK acts together with NatA in  
868 cotranslational N-terminal acetylation and prevention of Huntingtin aggregation. *Mol. Cell.*  
869 *Biol.* **30**, 1898–1909 (2010).
- 870 5. Gottlieb, L. & Marmorstein, R. Structure of Human NatA and Its Regulation by the  
871 Huntingtin Interacting Protein HYPK. *Structure* **26**, 925-935.e8 (2018).
- 872 6. Arnesen, T. *et al.* Characterization of hARD2, a processed hARD1 gene duplicate,  
873 encoding a human protein N-alpha-acetyltransferase. *BMC Biochem.* **7**, 13 (2006).
- 874 7. Gendron, R. L. *et al.* Loss of tubedown expression as a contributing factor in the  
875 development of age-related retinopathy. *Invest. Ophthalmol. Vis. Sci.* **51**, 5267–5277  
876 (2010).
- 877 8. Dörfel, M. J. & Lyon, G. J. The biological functions of Naa10 - from amino-terminal  
878 acetylation to human disease. *Gene* **567**, 103–131 (2015).
- 879 9. Aksnes, H., Ree, R. & Arnesen, T. Co-translational, Post-translational, and Non-catalytic  
880 Roles of N-Terminal Acetyltransferases. *Mol. Cell* **73**, 1097–1114 (2019).



- 881 10. Kweon, H. Y. *et al.* Naa12 compensates for Naa10 in mice in the amino-terminal acetylation  
882 pathway. *Elife* **10**, (2021).
- 883 11. Blomen, V. A. *et al.* Gene essentiality and synthetic lethality in haploid human cells.  
884 *Science* **350**, 1092–1096 (2015).
- 885 12. Wang, T. *et al.* Identification and characterization of essential genes in the human genome.  
886 *Science* **350**, 1096–1101 (2015).
- 887 13. Rope, A. F. *et al.* Using VAAST to identify an X-linked disorder resulting in lethality in male  
888 infants due to N-terminal acetyltransferase deficiency. *Am. J. Hum. Genet.* **89**, 28–43  
889 (2011).
- 890 14. Lyon, G. J. Personal account of the discovery of a new disease using next-generation  
891 sequencing. Interview by Natalie Harrison. *Pharmacogenomics* **12**, 1519–1523 (2011).
- 892 15. Gogoll, L. *et al.* Confirmation of Ogden syndrome as an X-linked recessive fatal disorder  
893 due to a recurrent NAA10 variant and review of the literature. *Am. J. Med. Genet. A* **185**,  
894 2546–2560 (2021).
- 895 16. Van Damme, P., Støve, S. I., Glomnes, N., Gevaert, K. & Arnesen, T. A *Saccharomyces*  
896 *cerevisiae* model reveals in vivo functional impairment of the Ogden syndrome N-terminal  
897 acetyltransferase NAA10 Ser37Pro mutant. *Mol. Cell. Proteomics* **13**, 2031–2041 (2014).
- 898 17. Dörfel, M. J. *et al.* Proteomic and genomic characterization of a yeast model for Ogden  
899 syndrome. *Yeast* **34**, 19–37 (2017).
- 900 18. Myklebust, L. M. *et al.* Biochemical and cellular analysis of Ogden syndrome reveals  
901 downstream Nt-acetylation defects. *Hum. Mol. Genet.* **24**, 1956–1976 (2015).
- 902 19. Bader, I. *et al.* Severe syndromic ID and skewed X-inactivation in a girl with NAA10  
903 dysfunction and a novel heterozygous de novo NAA10 p.(His16Pro) variant - a case report.  
904 *BMC Med. Genet.* **21**, 153 (2020).

- 905 20. Cheng, H. *et al.* Phenotypic and biochemical analysis of an international cohort of  
906 individuals with variants in NAA10 and NAA15. *Hum. Mol. Genet.* (2019)  
907 doi:10.1093/hmg/ddz111.
- 908 21. McTiernan, N. *et al.* NAA10 p.(N101K) disrupts N-terminal acetyltransferase complex NatA  
909 and is associated with developmental delay and hemihypertrophy. *Eur. J. Hum. Genet.* **29**,  
910 280–288 (2021).
- 911 22. Ree, R. *et al.* A novel NAA10 p.(R83H) variant with impaired acetyltransferase activity  
912 identified in two boys with ID and microcephaly. *BMC Med. Genet.* **20**, 101 (2019).
- 913 23. Støve, S. I. *et al.* A novel NAA10 variant with impaired acetyltransferase activity causes  
914 developmental delay, intellectual disability, and hypertrophic cardiomyopathy. *Eur. J. Hum.*  
915 *Genet.* **26**, 1294–1305 (2018).
- 916 24. Afrin, A. *et al.* NAA10 variant in 38-week-gestation male patient: a case study. *Cold Spring*  
917 *Harb Mol Case Stud* **6**, (2020).
- 918 25. Johnston, J. J. *et al.* NAA10 polyadenylation signal variants cause syndromic  
919 microphthalmia. *J. Med. Genet.* jmedgenet-2018 (2019).
- 920 26. Gupta, A. S., Saif, H. A., Lent, J. M. & Couser, N. L. Ocular Manifestations of the NAA10-  
921 Related Syndrome. *Case Rep. Genet.* **2019**, 8492965 (2019).
- 922 27. Maini, I. *et al.* Clinical Manifestations in a Girl with NAA10-Related Syndrome and  
923 Genotype–Phenotype Correlation in Females. *Genes* **12**, 900 (2021).
- 924 28. Cheng, H. *et al.* Truncating Variants in NAA15 Are Associated with Variable Levels of  
925 Intellectual Disability, Autism Spectrum Disorder, and Congenital Anomalies. *Am. J. Hum.*  
926 *Genet.* **102**, 985–994 (2018).
- 927 29. Ward, T. *et al.* Mechanisms of congenital heart disease caused by NAA15  
928 haploinsufficiency. *Circ. Res.* **128**, 1156–1169 (2021).

- 929 30. Dingemans, A. J. M. *et al.* Human disease genes website series: An international, open and  
930 dynamic library for up-to-date clinical information. *Am. J. Med. Genet. A* **185**, 1039–1046  
931 (2021).
- 932 31. Richards, S. *et al.* Standards and guidelines for the interpretation of sequence variants: a  
933 joint consensus recommendation of the American College of Medical Genetics and  
934 Genomics and the Association for Molecular Pathology. *Genet. Med.* **17**, 405–424 (2015).
- 935 32. McTiernan, N. *et al.* Biochemical analysis of novel NAA10 variants suggests distinct  
936 pathogenic mechanisms involving impaired protein N-terminal acetylation. *Hum. Genet.*  
937 (2022) doi:10.1007/s00439-021-02427-4.
- 938 33. Saunier, C. *et al.* Expanding the Phenotype Associated with NAA10-Related N-Terminal  
939 Acetylation Deficiency. *Hum. Mutat.* **37**, 755–764 (2016).
- 940 34. Resnik, P. Using information content to evaluate semantic similarity in a taxonomy. *arXiv*  
941 [*cmp-lg*] (1995).
- 942 35. Couto, F. M. & Lamurias, A. Semantic Similarity Definition. in *Encyclopedia of*  
943 *Bioinformatics and Computational Biology* 870–876 (Elsevier, 2019).
- 944 36. Hsieh, T.-C. *et al.* GestaltMatcher facilitates rare disease matching using facial phenotype  
945 descriptors. *Nat. Genet.* (2022) doi:10.1038/s41588-021-01010-x.
- 946 37. Hustinx, A. *et al.* Improving Deep Facial Phenotyping for Ultra-rare Disorder Verification  
947 Using Model Ensembles. in *Proceedings of the IEEE/CVF Winter Conference on*  
948 *Applications of Computer Vision* 5018–5028 (2023).
- 949 38. Casey, J. P. *et al.* NAA10 mutation causing a novel intellectual disability syndrome with  
950 Long QT due to N-terminal acetyltransferase impairment. *Sci. Rep.* **5**, 16022 (2015).
- 951 39. Shishido, A. *et al.* A Japanese boy with NAA10-related syndrome and hypertrophic  
952 cardiomyopathy. *Hum. Genome Var.* **7**, 23 (2020).
- 953 40. Chaudhary, P., Ha, E., Vo, T. T. L. & Seo, J. H. Diverse roles of arrest defective 1 in cancer  
954 development. *Arch. Pharm. Res.* **42**, 1040–1051 (2019).

- 955 41. Sandomirsky, K., Marchi, E., Gavin, M., Amble, K. & Lyon, G. J. Phenotypic variability and  
956 Gastrointestinal Manifestations/Interventions for growth in Ogden syndrome (also known as  
957 NAA10-related Syndrome). *medRxiv* (2022) doi:10.1101/2022.03.16.22272517.
- 958 42. Gmail, L. @. & Hinton, G. Visualizing Data using t-SNE.  
959 <https://www.jmlr.org/papers/volume9/vandermaaten08a/vandermaaten08a.pdf?fbcl> (2008).
- 960 43. Lee, C.-C. *et al.* Naa10p inhibits beige adipocyte-mediated thermogenesis through N- $\alpha$ -  
961 acetylation of Pgc1 $\alpha$ . *Mol. Cell* **76**, 500-515.e8 (2019).
- 962 44. Chokron, S., Kovarski, K. & Dutton, G. N. Cortical Visual Impairments and Learning  
963 Disabilities. *Front. Hum. Neurosci.* **15**, 713316 (2021).
- 964 45. Lyon, G. J. *et al.* Expanding the Phenotypic spectrum of Ogden syndrome (NAA10-related  
965 neurodevelopmental syndrome) and NAA15-related neurodevelopmental syndrome.  
966 *medRxiv* (2022) doi:10.1101/2022.08.22.22279061.
- 967 46. Farmer, C. A. *et al.* Person Ability Scores as an Alternative to Norm-Referenced Scores as  
968 Outcome Measures in Studies of Neurodevelopmental Disorders. *Am. J. Intellect. Dev.*  
969 *Disabil.* **125**, 475–480 (2020).
- 970 47. Magin, R. S., Deng, S., Zhang, H., Cooperman, B. & Marmorstein, R. Probing the  
971 interaction between NatA and the ribosome for co-translational protein acetylation. *PLoS*  
972 *One* **12**, e0186278 (2017).
- 973 48. Lyon, G. J. & O’Rawe, J. Human genetics and clinical aspects of neurodevelopmental  
974 disorders. in *The Genetics of Neurodevelopmental Disorders*. (ed. Mitchell, K.) (Wiley),  
975 2015).
- 976 49. Deng, S., McTiernan, N., Wei, X., Arnesen, T. & Marmorstein, R. Molecular basis for N-  
977 terminal acetylation by human NatE and its modulation by HYPK. *Nat. Commun.* **11**, 818  
978 (2020).
- 979 50. Olsen, J. V. *et al.* Quantitative phosphoproteomics reveals widespread full phosphorylation  
980 site occupancy during mitosis. *Sci. Signal.* **3**, ra3 (2010).

- 981 51. Esmailpour, T. *et al.* A splice donor mutation in NAA10 results in the dysregulation of the  
982 retinoic acid signalling pathway and causes Lenz microphthalmia syndrome. *J. Med. Genet.*  
983 **51**, 185–196 (2014).
- 984 52. Wu, Y. & Lyon, G. J. NAA10-related syndrome. *Exp. Mol. Med.* **50**, 85 (2018).
- 985 53. Sidhu, M., Brady, L., Tarnopolsky, M. & Ronen, G. M. Clinical Manifestations Associated  
986 With the N-Terminal-Acetyltransferase NAA10 Gene Mutation in a Girl: Ogden Syndrome.  
987 *Pediatr. Neurol.* **76**, 82–85 (2017).
- 988 54. Biesecker, L. G. *et al.* A dyadic approach to the delineation of diagnostic entities in clinical  
989 genomics. *Am. J. Hum. Genet.* **108**, 8–15 (2021).
- 990
